# Supplementary material for: Late Cenozoic Sea Surface Temperature evolution of the South Atlantic Ocean
Source: Copernicus journal article supplement (doi:10.5194/egusphere-2023-291), 2023-03-01
Supplement: Supplementary file 1 [file 1536 OG Supplement.xlsx]

## Sheet: Sheet3
Supplementary Table 4
Concentrations of GDGTs at Site U1536. Samples with deapth marked in red had too low concentrations of GDGTs to be integrated. Table showing GDGT peak area values, TEX86 (Schouten et al., 2002) and BIT index values (Hopmans et al., 2004), Methane Index (Methzhang) values (Zhang et al., 2011), GDGT2/Crenarchaeol ratios (Weijers et al., 2011), GDGT-0/Crenarchaeol ratios (Blaga et al., 2009) and GDG…
		GDGT-0	GDGT-1	GDGT-2	GDGT-3	GDGT-4	GDGT-4'	GDGT-IIIa	GDGT-IIIa'	SUM GDGT-IIIa	GDGT-IIa	GDGT-IIa'	SUM GDGT-IIa	GDGT-Ia													non-thermal bias = TRUE								Calibrated SST
Depth (mbsf)	Age (Ma)	1302	1300	1298	1296	1292	1292'	1050-1	1050-2	1050-tot	1036-1	1036-2	1036-tot	1022	1020	1018	TEX86	GDGT2/GDGT3	GDGT2/cren	GDGT0/cren	Methzhang	fcren	Ring index	RITEX	CAP-Ring	BIT	outlierBIT	outlierfcren	outlierGDGT2/3	outlierGDGT2/cren	outlierGDGT0/cren	outlierMethzhang	outlierCAPRI	OUTLIERTEX	SST-Kim et al., (2010)	SST-O´Brien et al., (2017)	BAYSIAN SST (median 50%)	BAYSIAN SST (low 5%)	BAYSIAN SST (high 95%)
456.84	5.25801	1.52765e+06	60099.5	16707.9	4571.49	682939	11760.9	40456.1	361876	402332	13719.4	39584.2	53303.5	130307	9389.48	5728.23	0.354739	3.65481	0.0244647	2.23688	0.104859	0.0169295	1.25276	1.73464	0.481875	0.461778	TRUE	FALSE	FALSE	FALSE	TRUE	FALSE	TRUE	TRUE	7.81377	9.67865	3.50799	-6.62053	11.1329
457.84	5.29127	4.37517e+06	232750	61671.2	16879	2.85652e+06	37526.8	59929.5	226584	286513	73096.9	65214.2	138311	193772	15411.3	10839.2	0.332764	3.65373	0.0215897	1.53165	0.0971192	0.0129669	1.58075	1.7014	0.120652	0.178008	FALSE	FALSE	FALSE	FALSE	FALSE	FALSE	FALSE	FALSE	5.91408	8.3865	1.49463	-7.98797	9.48115
458.84	5.32453	2.0842e+06	51522.2	13530.6	3833.6	546830	10494.3	31623.4	336482	368105	13205.1	139672	152877	199669	26075.9	16695.1	0.350948	3.52948	0.0247437	3.81143	0.110005	0.0188298	0.85573	1.72868	0.872947	0.56857	TRUE	FALSE	FALSE	FALSE	TRUE	FALSE	TRUE	TRUE	7.49462	9.45575	3.21536	-6.13429	11.1677
463.51	5.47985	1.06652e+06	55450.4	16814	4690.55	683918	9715.04	25438	85702.5	111140	28742.3	23519.6	52261.9	54519.6	5216.2	4115.55	0.360212	3.58465	0.0245848	1.55943	0.0998652	0.014006	1.56642	1.74342	0.176999	0.241641	FALSE	FALSE	FALSE	FALSE	FALSE	FALSE	FALSE	FALSE	8.26856	10.0005	3.4615	-3.96092	11.5715
464.61	5.51644	8.85102e+06	490395	142774	37293.9	5.82908e+06	93691.9	139671	508575	648245	172873	191529	364401	390960	37734.1	25838.2	0.358251	3.82833	0.0244933	1.51842	0.101689	0.0158189	1.59146	1.74025	0.148788	0.194064	FALSE	FALSE	FALSE	FALSE	FALSE	FALSE	FALSE	FALSE	8.10645	9.88518	3.41013	-4.66761	11.3519
466.34	5.57398	1.12397e+06	60691.8	17585.9	4622.84	746702	10962.4	26698.5	143438	170136	26215.8	58423.8	84639.6	62058.6	6881.02	4433.96	0.3534	3.80414	0.0235515	1.50525	0.0986248	0.0144687	1.59854	1.73252	0.13398	0.297906	FALSE	FALSE	FALSE	FALSE	FALSE	FALSE	FALSE	FALSE	7.70143	9.59992	2.62046	-5.68079	11.9277
473.31
474.9	5.85868	4.08554e+06	233854	68341.2	19539.2	2.90873e+06	42171.6	56352.3	161491	217844	54646.1	37116.1	91762.2	73643.1	14747.7	10566.5	0.357378	3.49764	0.0234952	1.40458	0.0983105	0.0142911	1.66247	1.73885	0.0763733	0.116419	FALSE	FALSE	FALSE	FALSE	FALSE	FALSE	FALSE	FALSE	8.03392	9.83381	3.23638	-4.81602	10.39
476.1	5.89859	4.02664e+06	246723	72663	16236.7	2.79275e+06	39718.4	66353.5	194934	261288	52120.6	45702.1	97822.7	158192	10342.6	7359.39	0.34267	4.47524	0.0260184	1.44182	0.105938	0.0140225	1.63601	1.71599	0.0799786	0.156282	FALSE	FALSE	FALSE	FALSE	FALSE	FALSE	FALSE	FALSE	6.78552	8.96899	2.04794	-6.10882	9.87817
483.83
484.82	6.05462	3.18328e+06	200755	70171.8	15141.5	2.4164e+06	28210.6	19976.7	27939	47915.7	6299.57	11891.8	18191.3	31128.9	4758.54	1859.45	0.36122	4.63439	0.0290398	1.31737	0.104761	0.0115399	1.71881	1.74505	0.026245	0.0386834	FALSE	FALSE	FALSE	FALSE	FALSE	FALSE	FALSE	FALSE	8.35157	10.0597	3.95708	-5.54496	11.7324
501.65
505.21	6.1939	1.73792e+06	59138	10083.6	3707.75	391248	8839.8	33915.7	392982	426897	35490.9	331158	366649	321454	29866.5	13187.8	0.276769	2.71959	0.0257729	4.442	0.154179	0.0220947	0.764733	1.6312	0.86647	0.74025	TRUE	FALSE	FALSE	FALSE	TRUE	FALSE	TRUE	TRUE	0.440817	5.09401	-3.97978	-13.6718	4.97913
506.4
511.31	6.23557	2.73329e+06	123371	36771.6	9570.74	1.66068e+06	25539.8	41985.1	159300	201285	17922.5	25981	43903.5	130911	7396.55	4777.44	0.368149	3.84209	0.0221425	1.64588	0.0914434	0.0151462	1.51889	1.7565	0.23761	0.184654	FALSE	FALSE	FALSE	FALSE	FALSE	FALSE	FALSE	FALSE	8.91604	10.4672	4.58761	-4.45285	12.3239
512.53	6.2439	1.22751e+06	49587.1	15295.6	3229.18	434918	8741.24	13538.1	111589	125127	5504.16	11572	17076.2	52554.1	3980.58	3721.57	0.354781	4.73667	0.0351689	2.82239	0.133091	0.0197026	1.072	1.73471	0.662708	0.309298	FALSE	FALSE	FALSE	FALSE	TRUE	FALSE	TRUE	TRUE	7.81727	9.68111	3.25248	-5.10141	10.3808
521.26	6.30354	800210	23485.2	6167.13	1468.14	221745	4591.26	17539.8	333089	350628	9724.08	32705.9	42429.9	89909.8	4570.92	3527.66	0.342368	4.20063	0.0278118	3.6087	0.120876	0.0202851	0.894014	1.71553	0.821519	0.68534	TRUE	FALSE	FALSE	FALSE	TRUE	FALSE	TRUE	TRUE	6.7593	8.95122	1.86035	-6.52121	10.0576
523.96	6.32198	1.095e+06	35244.8	8228.42	1843.2	175606	4340.01	26728.6	184091	210820	56985.6	90081	147067	179726	7713.5	6572.9	0.290227	4.46421	0.0468573	6.23556	0.201172	0.0241184	0.58853	1.64617	1.05764	0.753784	TRUE	FALSE	FALSE	FALSE	TRUE	FALSE	TRUE	TRUE	1.85123	5.88532	-2.82423	-12.2337	5.40012
531.56
533.32	6.38592	3.88474e+06	119887	21394.8	5136.11	606318	16122.3	119927	598406	718333	124298	121042	245340	303371	23319.6	15723.5	0.262415	4.16556	0.0352864	6.40709	0.190436	0.0259017	0.573288	1.61656	1.04327	0.676347	TRUE	FALSE	FALSE	FALSE	TRUE	FALSE	TRUE	TRUE	-1.14113	4.25003	-4.55383	-16.181	3.0326
540.2	6.79449	1.94246e+06	58153.3	15772.6	3698.97	558671	14261	51929.4	215430	267360	86558.9	155459	242018	245719	11345	6639.05	0.367114	4.26407	0.0282324	3.47692	0.119321	0.0248912	0.922681	1.75477	0.832087	0.574756	TRUE	FALSE	FALSE	FALSE	TRUE	FALSE	TRUE	TRUE	8.83237	10.4063	3.89957	-3.50794	12.1627
541.25	6.94658	1.99798e+06	45418.2	12009.3	3001.91	390114	10488.3	302089	473371	775460	104605	109919	214525	333220	17056.1	11465.9	0.359564	4.00054	0.030784	5.12154	0.131074	0.0261812	0.683547	1.74237	1.05882	0.772305	TRUE	FALSE	FALSE	FALSE	TRUE	FALSE	TRUE	TRUE	8.2151	9.96237	3.73516	-3.79889	11.3974
550.56
551.14	7.83728	153022	4428.96	1398.33	156.476	19713.5	523.64	71098.7	29944	101043	8199.86	11762.1	19961.9	23811.5	4401.7	3445.94	0.319397	8.93636	0.0709323	7.76229	0.228206	0.0258752	0.494545	1.68275	1.18821	0.880183	TRUE	FALSE	FALSE	FALSE	TRUE	FALSE	TRUE	TRUE	4.69619	7.60052	0.253501	-8.90494	8.01083
560
561.14	8.095	500729	13129.3	3511.76	1119.1	82786	2436.95	21159.4	202040	223199	66925.7	37665.5	104591	105222	11760.3	21118.1	0.349942	3.13804	0.0424197	6.04847	0.172457	0.028595	0.603602	1.72711	1.12351	0.839499	TRUE	FALSE	FALSE	FALSE	TRUE	FALSE	TRUE	TRUE	7.40929	9.39656	3.13854	-5.72994	9.90652
561.14
569.83	8.31896	2.09749e+06	128900	43019.8	10341.5	1.45836e+06	19803.4	6356.4	43867.5	50223.9	28101.1	28322.5	56423.6	85167.8	10528.5	5425.89	0.362085	4.1599	0.0294987	1.43825	0.109768	0.0133973	1.63884	1.74646	0.107623	0.116239	FALSE	FALSE	FALSE	FALSE	FALSE	FALSE	FALSE	FALSE	8.42264	10.1106	3.82324	-4.82783	11.4379
588.36
598.1
599.24
607.46
608.69
617.03	14.2	4.28913e+06	285923	111705	20575.2	2.55715e+06	43386.9	16666.9	23554.8	40221.7	12343.8	14185.1	26528.9	51056.8	5095.74	3210.55	0.38057	5.42912	0.0436836	1.67731	0.138536	0.0166838	1.50156	1.77781	0.27625	0.0440409	FALSE	FALSE	FALSE	FALSE	FALSE	FALSE	FALSE	FALSE	9.90173	11.1975	5.38065	-2.08825	13.9225
617.19	14.22	1.06118e+07	1.05863e+06	453592	71080.3	7.78359e+06	179706	120331	136447	256778	36295	57223	93518.1	131075	17989.9	9466.3	0.399533	6.38141	0.0582754	1.36335	0.165849	0.0225667	1.68824	1.81232	0.124076	0.0582423	FALSE	FALSE	FALSE	FALSE	FALSE	FALSE	FALSE	FALSE	11.3462	12.3125	7.27773	-0.510817	15.1799
626.4	14.6659	1.18686e+07	977618	481689	85648.1	9.07381e+06	208430	297529	279689	577218	95898.3	93402.9	189301	250427	47108	21035.6	0.44244	5.62405	0.0530856	1.30801	0.142692	0.0224547	1.73278	1.89922	0.16644	0.10078	FALSE	FALSE	FALSE	FALSE	FALSE	FALSE	FALSE	FALSE	14.3764	14.8355	10.8719	2.33282	20.8422
627.47	14.7963	3.84426e+06	331338	127174	23707.2	2.79428e+06	54111.1	18036	15599.9	33635.9	7265.23	7566.09	14831.3	25082.7	4148.15	2015.71	0.382213	5.36438	0.0455125	1.37576	0.144784	0.0189971	1.67952	1.7807	0.101181	0.0256466	FALSE	FALSE	FALSE	FALSE	FALSE	FALSE	FALSE	FALSE	10.0297	11.2942	5.56365	-3.19675	12.1466
636.15
636.98	15.9555	628959	65647.7	38083	10536.2	367369	13553.8	6092.87	14981.7	21074.6	3767.33	4536.24	8303.58	14197.5	1458.65	1580.36	0.486408	3.6145	0.103664	1.71206	0.230754	0.0355814	1.50969	2.00095	0.491265	0.106038	FALSE	FALSE	FALSE	FALSE	FALSE	FALSE	TRUE	TRUE	17.1908	17.4208	14.2848	6.09655	23.5292
637.22
637.99	16.0786	3.4402e+06	331845	136340	20428.8	2.49807e+06	61459.6	29076.4	42888.2	71964.6	12230.6	14734.3	26964.9	37761.5	5157.55	3659.33	0.396726	6.67393	0.0545783	1.37715	0.160299	0.0240121	1.68054	1.80706	0.126522	0.0518799	FALSE	FALSE	FALSE	FALSE	FALSE	FALSE	FALSE	FALSE	11.1368	12.1475	7.46369	-1.3412	15.4376
