# Supplementary material for: Late Cenozoic Sea Surface Temperature evolution of the South Atlantic Ocean
Source: Copernicus journal article supplement (doi:10.5194/egusphere-2023-291), 2023-03-01
Supplement: Supplementary file 2 [file 696 OG supplement.xlsx]

## Sheet: Site 696 OG
Supplementary Table 3
Concentrations of GDGTs at SIte 696. All samples and corresponding depths, GDGT peak area values, TEX86 (Schouten et al., 2002) and BIT index values (Hopmans et al., 2004), Methane Index (Methzhang) values (Zhang et al., 2011), GDGT2/Crenarchaeol ratios (Weijers et al., 2011), GDGT-0/Crenarchaeol ratios (Blaga et al., 2009) and GDGT-2/GDGT-3 ratios (Taylor et al., 2013), and RING index (Sinninghe…
			GDGT-0	GDGT-1	GDGT-2	GDGT-3	GDGT-4	GDGT-4'	GDGT-IIIa	GDGT-IIIa'	SUM GDGT-IIIa	GDGT-IIa	GDGT-IIa'	SUM GDGT-IIa	GDGT-Ia			STD											non-thermal bias = TRUE								Calibrated SST
Core	Depth (mbsf)	Age (Ma)	1302	1300	1298	1296	1292	1292'	1050-1	1050-2	1050-tot	1036-1	1036-2	1036-tot	1022	1020	1018	744	TEX86	GDGT2/GDGT3	GDGT2/cren	GDGT0/cren	Methzhang	fcren	Ring index	RITEX	CAP-Ring	BIT	outlierBIT	outlierfcren	outlierGDGT2/3	outlierGDGT2/cren	outlierGDGT0/cren	outlierMethzhang	outlierCAPRI	OUTLIERTEX	SST-Kim et al., (2010)	SST-O´Brien et al., (2017)	BAYSIAN SST (median 50%)	BAYSIAN SST (low 5%)	BAYSIAN SST (high 95%)
50R 01(02)W 88-92	521.08	16.4	6518256	700546	297187	72330.7	6562262	267414	15142.8	26093.8	41236.6	24496.7	56039.2	80535.9	53711.2	7443.2	6821.3	657058	0.476219	4.10873	0.0452873	0.993294	0.135456	0.0391547	1.99963	1.97624	0.0233919	0.0260449	FALSE	FALSE	FALSE	FALSE	FALSE	FALSE	FALSE	FALSE	16.562	16.8217	14.1941	5.90835	22.8387
50R 02W 26-29	521.49	16.5011	862945	91024.6	43681.5	11126.3	862827	26043.5	5030	6958.7	11988.7	2690	3002.2	5692.2	10254.6	2351.4	1800	4.61572e+06	0.470405	3.92597	0.050626	1.00014	0.140941	0.0292995	1.98522	1.96244	0.0227794	0.0313613	FALSE	FALSE	FALSE	FALSE	FALSE	FALSE	FALSE	FALSE	16.1971	16.4798	13.664	5.42153	21.0697
51R 02W 24-28	531.81	23.3227	1690140	258043	127943	23696.3	1533420	35668.4	11240.6	15753.8	26994.4	12485.6	27509.4	39995	37983.1	3090.43	3777.61	4650630	0.420585	5.39928	0.0834364	1.1022	0.207039	0.0227319	1.87014	1.85343	0.016709	0.0640704	FALSE	FALSE	FALSE	FALSE	FALSE	FALSE	FALSE	FALSE	12.8716	13.5504	9.70666	1.32532	16.6
52R 01W 0-4	548.9	33.2	656047	49298.4	22360.1	6288.9	577734	9909.3	11789.8	16210.3	28000.1	12471.7	3547.8	16019.5	29140.1	4005	3585.6	693076	0.438877	3.55549	0.0387031	1.13555	0.11711	0.0168628	1.86394	1.89154	0.0275971	0.112399	FALSE	FALSE	FALSE	FALSE	FALSE	FALSE	FALSE	FALSE	14.1363	14.626	11.0424	3.42175	17.9873
53R 01W 16-18	549.06	33.22	11675100	911459	384362	93267.7	9996280	149039	77977.3	98668.9	176646	60097.5	40981.7	101079	221780	56263	32913.9	24167400	0.407423	4.12106	0.0384505	1.16794	0.12043	0.0146904	1.83292	1.82738	0.00554109	0.047591	FALSE	FALSE	FALSE	FALSE	FALSE	FALSE	FALSE	FALSE	11.9271	12.7765	7.72434	0.0492197	15.1653
53R 01W 90-92	549.8	33.2746	128814000	9410720	4656170	1128390	127478000	1565610	703484	923239	1626723	901120	376037	1277157	3336140	622188	323613	3810150	0.438531	4.12638	0.0365253	1.01048	0.105348	0.0121324	1.97135	1.8908	0.080551	0.0466655	FALSE	FALSE	FALSE	FALSE	FALSE	FALSE	FALSE	FALSE	14.1128	14.6056	10.8809	2.5359	17.5929
53R 01W 134-136	550.24	33.277	1532930	64927.9	45678.4	13209.8	1242170	15172.1	9690	12821.4	22511.4	10941.7	5926.91	16868.6	44056.9	8379.62	4235.05	2660720	0.532853	3.45792	0.0367731	1.23407	0.0896466	0.0120668	1.79311	2.12236	0.329248	0.0629424	FALSE	FALSE	FALSE	FALSE	FALSE	FALSE	TRUE	TRUE	19.9	20.1518	18.3403	10.9341	27.9944
53R 02W 54-56	550.94	33.2807	3009580	231384	107040	24683.7	2569190	32094.1	19794.7	24729.4	44524.1	22790.6	11062.3	33852.9	78154.5	16763.4	10342.3	139360	0.414517	4.33646	0.0416629	1.17141	0.12249	0.0123378	1.82871	1.84128	0.0125702	0.0574275	FALSE	FALSE	FALSE	FALSE	FALSE	FALSE	FALSE	FALSE	12.4399	13.1936	9.26874	-0.563568	16.1366
53R 02W 132-134	551.72	33.2868	3992420	266788	181730	35471.3	3661390	66331.8	24173.1	24779.9	48953	37442.7	16957.6	54400.3	147402	25498.8	14205.4	2545220	0.515214	5.1233	0.0496342	1.09041	0.114915	0.0177942	1.90728	2.07456	0.167287	0.0640966	FALSE	FALSE	FALSE	FALSE	FALSE	FALSE	FALSE	FALSE	18.9	19.1146	16.9682	9.3936	26.2734
53R 03W 8-10	551.98	33.3043	5689460	294136	202786	48156.1	4899170	80280.6	34770.6	35539.4	70310	32992.8	19752	52744.8	135026	25651.3	14358.2	382207	0.529652	4.21101	0.0413919	1.16131	0.0986651	0.0161224	1.85144	2.11353	0.262097	0.0500423	FALSE	FALSE	FALSE	FALSE	FALSE	FALSE	FALSE	FALSE	19.721	19.9636	17.8092	10.9757	27.055
53R 03W 111-114	553.01	33.2921	121212328	5440365	2.86928e+06	1.06306e+06	113681056	1.67693e+06	768470	826076	1.59455e+06	1.34694e+06	460890	1.80783e+06	4083668	773129	432844	3113097	0.507643	2.69908	0.0252397	1.06625	0.0751435	0.0145368	1.93459	2.05468	0.120089	0.0617828	FALSE	FALSE	FALSE	FALSE	FALSE	FALSE	FALSE	FALSE	18.4602	18.6694	16.5731	7.96721	24.2291
53R 04W 83-85	554.23	33.2818	5007380	232645	114460	40469.9	4252040	56444.8	31793.7	35098.4	66892.1	30329.3	17479.2	47808.5	124728	24253.7	12317	4213950	0.476048	2.82827	0.0269188	1.17764	0.0825319	0.0131008	1.83614	1.97583	0.139683	0.0533074	FALSE	FALSE	FALSE	FALSE	FALSE	FALSE	FALSE	FALSE	16.5513	16.8116	13.4263	5.65846	20.3693
53R 05W 9-11	554.99	33.3189	3991250	187848	102702	34152.2	3543220	47832.3	22523.1	26836.3	49359.4	23246.2	10542.3	33788.5	81368.4	18723.1	10407.8	1838420	0.495757	3.00719	0.0289855	1.12645	0.082922	0.0133199	1.87934	2.02424	0.144904	0.0443711	FALSE	FALSE	FALSE	FALSE	FALSE	FALSE	FALSE	FALSE	17.7564	17.9705	15.5006	7.71513	23.3994
53R 05W 11-13	555.01	33.3205	2207930	156848	58074.7	21174	2071260	30859.9	17711.8	16542.5	34254.3	24422.2	27181	51603.2	49691.3	10446.4	5673.04	3204600	0.412459	2.74274	0.0280383	1.06598	0.100973	0.0146804	1.92361	1.83721	0.0863943	0.061423	FALSE	FALSE	FALSE	FALSE	FALSE	FALSE	FALSE	FALSE	12.292	13.0726	8.70901	-0.0877797	14.6791
53R 05W 14-16	555.04	33.3228	10437400	447921	336847	68603	5662560	85642	29178.5	36481.7	65660.2	27152.2	15189.5	42341.7	94317.1	20246	9995.75	1756930	0.522987	4.91009	0.0594867	1.84323	0.129268	0.0148989	1.42733	2.09537	0.668043	0.0344967	FALSE	FALSE	FALSE	FALSE	FALSE	FALSE	TRUE	TRUE	19.3448	19.5717	17.5322	9.68847	25.5304
53R 05W 16-18	555.06	33.3243	3167150	273924	128590	26875.4	2798850	42410.6	16361.9	19743.7	36105.6	13472.6	9389.89	22862.5	50133.3	12577	7089.93	2929580	0.419407	4.78467	0.0459439	1.13159	0.131286	0.0149267	1.86038	1.85105	0.00933176	0.0375183	FALSE	FALSE	FALSE	FALSE	FALSE	FALSE	FALSE	FALSE	12.7882	13.4811	9.28881	1.86128	15.902
53R 05W 18-19	555.08	33.3258	15370500	1213940	534817	115553	13670200	203425	150835	183430	334265	67603.7	41016.4	108620	251697	63359.9	32725.1	33798000	0.412913	4.62833	0.0391228	1.12438	0.11846	0.0146627	1.86846	1.83811	0.0303479	0.0483531	FALSE	FALSE	FALSE	FALSE	FALSE	FALSE	FALSE	FALSE	12.3247	13.0993	8.79637	-0.396374	15.1598
53R 05W 19-20	555.09	33.3266	2182230	186801	98671.5	32513.5	1957390	35698.8	11869.5	15788.9	27658.4	11296.4	7513.18	18809.6	37969.5	9115.03	4780.66	2044730	0.471843	3.03479	0.0504097	1.11487	0.137592	0.0179113	1.88147	1.96583	0.0843577	0.0413539	FALSE	FALSE	FALSE	FALSE	FALSE	FALSE	FALSE	FALSE	16.2878	16.5644	13.4445	5.71937	20.7861
53R 05W 21-22	555.11	33.3281	3251290	237569	130994	36514.6	3121600	51639.2	17645.1	24155.2	41800.3	14683.2	13776.9	28460.1	66230.9	16318	8753.97	2570280	0.479833	3.58744	0.0419637	1.04155	0.113203	0.0162733	1.9477	1.98492	0.0372197	0.041893	FALSE	FALSE	FALSE	FALSE	FALSE	FALSE	FALSE	FALSE	16.7866	17.0342	14.0989	7.14687	21.4079
53R 05W 23-24	555.13	33.3297	3243480	237985	93860.3	43868.8	3012370	44056.9	18430.6	25145	43575.6	16369.4	9376.63	25746	63893.2	14597.1	7216.54	1804960	0.43306	2.13957	0.0311583	1.07672	0.109469	0.0144145	1.91488	1.87918	0.0357013	0.0423498	FALSE	FALSE	FALSE	FALSE	FALSE	FALSE	FALSE	FALSE	13.7399	14.2839	10.1989	2.297	17.2926
53R 05W 29-30	555.19	33.3342	1472670	113499	58174.2	19490	1336690	21786.5	8904.97	10781.9	19686.9	6940.66	5551.18	12491.8	26277.4	6736.85	6736.85	2480290	0.467015	2.98482	0.0435211	1.10173	0.12336	0.0160375	1.89333	1.9545	0.0611725	0.0418996	FALSE	FALSE	FALSE	FALSE	FALSE	FALSE	FALSE	FALSE	15.9822	16.2805	13.0365	5.60211	20.1044
53R 05W 38-40	555.28	33.3411	206809000	19199900	10669200	3219610	257828000	5321790	1841600	2260980	4102580	1571130	1028160	2599290	5721560	1331740	732753	0	0.500139	3.31382	0.0413811	0.80212	0.111696	0.0202234	2.19223	2.03536	0.156876	0.0459699	FALSE	FALSE	FALSE	FALSE	FALSE	FALSE	FALSE	FALSE	18.0178	18.2282	15.5276	8.62897	22.6825
53R 05W 48-49	555.38	33.3488	2843720	218906	99935.1	25236.6	2726430	49799.1	16493	18808.8	35301.8	16148.1	6670.5	22818.6	59472.7	14304.6	7330.86	2043070	0.444227	3.95993	0.0366542	1.04302	0.11027	0.0179377	1.94489	1.90311	0.0417878	0.0413474	FALSE	FALSE	FALSE	FALSE	FALSE	FALSE	FALSE	FALSE	14.4962	14.9406	11.0898	2.43203	18.6993
53R 05W 50-51	555.4	33.3503	5803110	429398	210303	46768.3	5230690	80379.5	33319.1	36015.3	69334.4	29944.3	18449.4	48393.7	119458	27262.1	15661	4680550	0.440049	4.4967	0.0402056	1.10943	0.114459	0.0151343	1.88418	1.89406	0.00987331	0.0433781	FALSE	FALSE	FALSE	FALSE	FALSE	FALSE	FALSE	FALSE	14.2154	14.6949	10.6835	3.24266	18.4292
53R 05W 51-52	555.41	33.3511	1986680	155459	87138.9	25675.9	1847010	33337.2	11540.3	15447.5	26987.8	9213.71	7753.08	16966.8	71520.7	10676.8	6089.25	1653610	0.484571	3.3938	0.0471784	1.07562	0.124859	0.0177293	1.91719	1.99645	0.0792579	0.0588414	FALSE	FALSE	FALSE	FALSE	FALSE	FALSE	FALSE	FALSE	17.0785	17.3128	14.2644	7.12577	21.4483
53R 05W 53-54	555.43	33.3526	4343240	228819	183145	62510.1	3795510	59751.8	22393.4	25942.7	48336.1	20624.8	11305.3	31930.1	76541.6	18936.6	10248	2513100	0.571681	2.92985	0.0482531	1.14431	0.109585	0.0154988	1.8683	2.23485	0.36655	0.0396749	FALSE	FALSE	FALSE	FALSE	FALSE	FALSE	TRUE	TRUE	21.9893	22.4349	21.3598	14.3447	32.0885
53R 05W 56-57	555.46	33.3549	2716690	196850	66666.6	28122.3	1598290	26580.3	10965.7	13569.4	24535.1	10255.4	7153.38	17408.8	33616.9	7910.39	5108.43	6181700	0.381401	2.3706	0.0417112	1.69975	0.152172	0.0163584	1.49228	1.77927	0.286991	0.0451419	FALSE	FALSE	FALSE	FALSE	FALSE	FALSE	FALSE	FALSE	9.96654	11.2464	6.52523	-2.25035	12.9051
53R 05W 58-59	555.48	33.3564	1758050	144643	74082.5	19636.4	1575220	27830.1	10608.9	12233.9	22842.8	10910.2	5346.72	16256.9	34379.9	8463.36	5388.07	2901420	0.456622	3.77271	0.0470299	1.11607	0.129445	0.0173607	1.87915	1.93063	0.0514853	0.0445682	FALSE	FALSE	FALSE	FALSE	FALSE	FALSE	FALSE	FALSE	15.3137	15.6693	12.4175	3.8272	19.9293
53R 05W 64-65	555.54	33.361	1942890	151432	83450	25966.3	1713250	28529.5	11479.7	11100.7	22580.4	12973.5	6405.28	19378.8	45731.6	9985.71	5933.94	2044000	0.476698	3.21378	0.0487086	1.13404	0.130253	0.0163795	1.86626	1.97738	0.111126	0.0486917	FALSE	FALSE	FALSE	FALSE	FALSE	FALSE	FALSE	FALSE	16.5918	16.8498	13.9558	6.65821	20.4928
53R 05W 75-77	555.65	33.3695	2882120	136902	111577	24988	2687170	35383.5	17310.3	18717.6	36027.9	15043.1	8783.8	23826.9	74699.6	15932.6	9084.33	2145130	0.556737	4.46522	0.0415221	1.07255	0.0912767	0.0129964	1.92667	2.19037	0.263697	0.0476852	FALSE	FALSE	FALSE	FALSE	FALSE	FALSE	FALSE	FALSE	21.2025	21.5561	20.1233	12.7227	28.9941
53R 05W 81-82	555.71	33.374	1775690	128929	73767.5	23608.9	1625410	28515	10895.1	13864	24759.1	11765.1	5792.26	17557.4	39189.5	9767.64	5718.93	1847350	0.49404	3.12456	0.0453839	1.09246	0.12036	0.0172408	1.90458	2.01992	0.11534	0.0477504	FALSE	FALSE	FALSE	FALSE	FALSE	FALSE	FALSE	FALSE	17.6533	17.8695	15.1288	7.37129	22.6373
53R 05W 83-84	555.73	33.3756	4479820	349880	188157	40666.2	4147600	68813.7	27296.4	31518	58814.4	26774.3	14386.8	41161.1	106001	24138.4	15249.7	2526100	0.459659	4.62686	0.0453653	1.0801	0.120686	0.0163204	1.90986	1.93753	0.0276714	0.047312	FALSE	FALSE	FALSE	FALSE	FALSE	FALSE	FALSE	FALSE	15.5106	15.8479	12.2212	5.15716	19.0942
53R 05W 85-86	555.75	33.3771	19611100	1281970	527405	155634	17416900	217527	116879	138408	255287	123070	47204.3	170274	413060	92094.7	48034	1963330	0.412624	3.38875	0.0302812	1.12598	0.100258	0.0123354	1.87045	1.83754	0.0329138	0.045938	FALSE	FALSE	FALSE	FALSE	FALSE	FALSE	FALSE	FALSE	12.3039	13.0823	8.7565	0.304579	15.7537
53R 05W 86-87	555.76	33.3779	3265220	215057	133269	40295.4	3029790	54821.6	19910.1	23731	43641.1	21477.3	9560.49	31037.8	77444.9	17367.3	10368.9	2576030	0.515029	3.3073	0.0439862	1.07771	0.11189	0.0177726	1.92046	2.07407	0.153614	0.0478089	FALSE	FALSE	FALSE	FALSE	FALSE	FALSE	FALSE	FALSE	18.8893	19.1037	16.7559	9.26161	25.3899
53R 05W 88-89	555.78	33.3786	4370010	344472	156032	51136.8	3858570	62926.2	25725.3	29727.3	55452.6	22769.6	15031.6	37801.2	92040.8	23177.7	12348.1	2257990	0.439488	3.05127	0.0404378	1.13255	0.123323	0.0160465	1.86539	1.89285	0.0274604	0.0458212	FALSE	FALSE	FALSE	FALSE	FALSE	FALSE	FALSE	FALSE	14.1776	14.6619	10.3901	2.9355	18.2253
53R 05W 94-96	555.84	33.3786	7184080	547324	227006	58803.1	6255200	96693.8	39049.3	45212.8	84262.1	34344.4	22936.9	57281.3	221586	35279	18792	145790	0.41137	3.86044	0.0362908	1.1485	0.115954	0.0152228	1.85017	1.83507	0.0150991	0.0548672	FALSE	FALSE	FALSE	FALSE	FALSE	FALSE	FALSE	FALSE	12.2135	13.0086	8.65182	0.516357	15.3238
53R 05W 102-103	555.92	33.3785	1197150	79525.1	28404.4	10684.1	1013610	17685.7	6546.08	7474.03	14020.1	4898.69	3222.45	8121.14	20576.8	4804.86	2264.54	2097430	0.416541	2.65857	0.028023	1.18108	0.10315	0.017149	1.82934	1.8453	0.0159642	0.0404401	FALSE	FALSE	FALSE	FALSE	FALSE	FALSE	FALSE	FALSE	12.5846	13.3126	9.4767	1.52477	16.5244
53R 05W 104-105	555.94	33.3785	2107300	185122	56714	18883.8	1841120	28664.2	12272.2	13691.9	25964.1	10949.6	6000.71	16950.3	42292.8	9782.64	5498.37	3281850	0.360289	3.00332	0.0308041	1.14458	0.122375	0.0153302	1.84868	1.74354	0.105137	0.044233	FALSE	FALSE	FALSE	FALSE	FALSE	FALSE	FALSE	FALSE	8.27497	10.005	4.19575	-4.90961	12.0346
53R 05W 106-107	555.96	33.3784	3349590	251673	133703	29060.6	3018090	47096.4	19068.1	23635	42703.1	17425.4	11045.9	28471.3	92198	14485.9	7366.96	2573630	0.454702	4.60083	0.0443005	1.10984	0.119104	0.0153649	1.88411	1.9263	0.0421899	0.0513514	FALSE	FALSE	FALSE	FALSE	FALSE	FALSE	FALSE	FALSE	15.1885	15.5565	12.0726	4.84136	19.3805
53R 05W 107-108	555.97	33.3784	2592870	209084	86362.9	26048.1	2202340	32611.7	15870.7	17933.3	33804	16058.3	7331.78	23390.1	67810.6	11060.8	5733.31	2200870	0.409545	3.31552	0.0392142	1.17733	0.125759	0.0145917	1.82544	1.8315	0.00606625	0.0537113	FALSE	FALSE	FALSE	FALSE	FALSE	FALSE	FALSE	FALSE	12.0814	12.9013	8.18983	-0.107536	15.0462
53R 05W 109-110	555.99	33.3784	4396100	339713	144525	34061.6	3624550	59345.1	24633.2	29887.2	54520.4	19838.4	13049.2	32887.6	106236	17986.3	9834.29	3213370	0.4119	4.24305	0.0398739	1.21287	0.12334	0.0161093	1.79879	1.83611	0.0373228	0.0507161	FALSE	FALSE	FALSE	FALSE	FALSE	FALSE	FALSE	FALSE	12.2517	13.0397	8.6077	-0.11034	15.028
53R 05W 111-112	556.01	33.3784	7848039	372807	162985	66213.1	6.38148e+06	131150	39179.1	47611.2	86790.3	38337.8	21536.8	59874.6	122206	33443.9	15668.6	4582198	0.491503	2.46152	0.0255403	1.22981	0.0846151	0.0201378	1.80101	2.01357	0.212561	0.0404295	FALSE	FALSE	FALSE	FALSE	FALSE	FALSE	FALSE	FALSE	17.5004	17.7204	14.7348	7.90665	23.3586
53R 05W 113-114	556.03	33.3784	29586950	1.26643e+06	553633	211098	23577736	596797	171299	191757	363055	173992	89549.5	263542	450318	122184	65472.5	1.72385e+06	0.518094	2.62263	0.0234812	1.25487	0.0775083	0.024687	1.78707	2.08223	0.29516	0.04368	FALSE	FALSE	FALSE	FALSE	FALSE	FALSE	FALSE	FALSE	19.0655	19.2839	17.2336	9.4276	25.8874
53R 05W 115-116	556.05	33.3783	7261131	309337	147680	59953.4	5.56851e+06	71026.7	41252.7	50432.8	91685.5	40682.2	24538.8	65221	111378	30448.7	15342.7	5581400	0.473914	2.46324	0.0265205	1.30396	0.0839714	0.0125944	1.7397	1.97074	0.231037	0.0459644	FALSE	FALSE	FALSE	FALSE	FALSE	FALSE	FALSE	FALSE	16.4178	16.6861	14.1613	4.89779	21.6572
53R 05W 130-132	556.2	33.3782	4696150	193438	79861.1	35054.5	3.38561e+06	89496.3	26122.4	30051.2	56173.6	26937.7	11908.5	38846.2	69580.2	21433.7	11430.4	8.14498e+06	0.513792	2.2782	0.0235884	1.38709	0.0815003	0.0257535	1.69333	2.0708	0.377472	0.0463634	FALSE	FALSE	FALSE	FALSE	FALSE	FALSE	TRUE	TRUE	18.8178	19.0309	16.9815	8.49	24.609
53R 05W 144-145	556.34	33.378	3312201	152661	75590.1	28497.6	2.8566e+06	59755.4	19776.4	22367.3	42143.7	19726.5	8652.3	28378.8	50786.5	15554.5	7149.2	3.82308e+06	0.517665	2.65251	0.0264616	1.15949	0.0809141	0.0204898	1.85878	2.08108	0.222302	0.0407363	FALSE	FALSE	FALSE	FALSE	FALSE	FALSE	FALSE	FALSE	19.0409	19.2587	17.3932	9.28844	25.9626
53R 05W 148-150	556.38	33.378	1.07709e+06	49662.9	23185.3	9293.2	810858	14016	8057.5	9646.1	17703.6	6466	2999.1	9465.1	23360.2	5791.2	3158.2	3.21655e+06	0.483525	2.49487	0.0285936	1.32833	0.0905623	0.0169917	1.72542	1.99389	0.268469	0.05866	FALSE	FALSE	FALSE	FALSE	FALSE	FALSE	FALSE	FALSE	17.0143	17.2513	14.3925	6.17284	22.7698
53R 06W 42-44	556.82	33.3769	4268876	183604	91237.2	35379.3	3.31075e+06	78607.7	26280.4	32733.4	59013.8	22485.3	16697.9	39183.2	97831.6	21051.5	13217.5	2896978	0.527802	2.57883	0.0275579	1.2894	0.0838529	0.0231925	1.76065	2.10846	0.347811	0.0558999	FALSE	FALSE	FALSE	FALSE	FALSE	FALSE	TRUE	TRUE	19.617	19.8547	17.6335	10.1471	25.9587
53R 06W 95-97	557.35	33.3735	3.11299e+06	136962	57020.4	24829.6	2.19656e+06	30899.7	19012.3	21788.4	40800.7	16452.8	10523.4	26976.2	47374.7	16942.9	9412.8	3.0492e+06	0.45152	2.29647	0.025959	1.41722	0.0894472	0.0138722	1.66125	1.91918	0.257929	0.0498123	FALSE	FALSE	FALSE	FALSE	FALSE	FALSE	FALSE	FALSE	14.9799	15.3694	11.7719	4.28691	19.0506
53R 06W 136-138	557.76	33.3722	3.85012e+06	177293	83427.1	30470.9	3.51411e+06	56594.5	26029.5	31722.4	57751.9	26576.3	18131.7	44708	104408	26233	14739.8	4368280	0.490223	2.73793	0.0237406	1.09562	0.0754009	0.0158497	1.9085	2.01039	0.101887	0.0555948	FALSE	FALSE	FALSE	FALSE	FALSE	FALSE	FALSE	FALSE	17.423	17.6451	14.7699	7.32302	23.9338
53R CCW 11-13	558.09	33.3843	1422835	67024	29426.5	10059.2	1.00473e+06	12353.6	10088.6	11264.6	21353.2	7249.8	6603.7	13853.5	34130.7	8578.8	4287.4	4.12978e+06	0.436125	2.92533	0.029288	1.41614	0.094794	0.0121461	1.65894	1.88567	0.226721	0.0645561	FALSE	FALSE	FALSE	FALSE	FALSE	FALSE	FALSE	FALSE	13.9494	14.4642	10.7225	3.08636	17.703
54R 01W 20-22	558.7	33.4031	3.20001e+06	144289	79925.1	24539.4	2.33493e+06	35264.3	22059.1	28095.7	50154.8	15453.4	10246.1	25699.5	48737.3	17672.4	9070.8	3.92132e+06	0.491973	3.25701	0.0342303	1.3705	0.0949823	0.0148783	1.69421	2.01474	0.320537	0.0506569	FALSE	FALSE	FALSE	FALSE	FALSE	FALSE	TRUE	TRUE	17.5288	17.748	14.8873	7.53991	22.6745
54R 01W 74-76	559.24	33.4057	4883372	226788	113900	41058.9	3.78627e+06	66829.6	42705.1	57612.2	100317	41796.3	19120.9	60917.2	117493	31719.9	16036.5	5.82569e+06	0.494427	2.77407	0.0300824	1.28976	0.0901442	0.0173444	1.75365	2.02089	0.267242	0.0685676	FALSE	FALSE	FALSE	FALSE	FALSE	FALSE	FALSE	FALSE	17.6766	17.8923	14.8966	7.87688	22.9584
54R 02W 24-26	560.24	33.4176	2.4481e+06	104663	58438.2	21707.8	1778638	23140.2	21717.4	23352	45069.4	30219.9	12380.3	42600.2	93007.5	18709.7	11199.9	2.69862e+06	0.49669	2.69204	0.0328556	1.37639	0.0930283	0.012843	1.68981	2.0266	0.336785	0.0922144	FALSE	FALSE	FALSE	FALSE	FALSE	FALSE	TRUE	TRUE	17.8122	18.0254	15.2188	7.89522	23.5334
54R 02W 128-130	561.28	33.4308	8413760	554440	309411	80044.9	7102860	97732.9	63349.6	67748	131098	87549.6	28135.9	115686	303305	53342.6	28977.7	295747	0.467718	3.86547	0.0435615	1.18456	0.115894	0.0135729	1.82482	1.95614	0.131325	0.0718792	FALSE	FALSE	FALSE	FALSE	FALSE	FALSE	FALSE	FALSE	16.0269	16.3218	12.8031	6.07193	20.4039
54R 03W 33-35	561.83	33.4497	2.73007e+06	118944	129338	35014.1	2287951	35085	44124.2	28077.6	72201.8	100711	31460.6	132171	302325	32892.4	19370.7	4.47957e+06	0.626411	3.69389	0.0565302	1.19324	0.108695	0.0151031	1.83172	2.4104	0.578682	0.18131	FALSE	FALSE	FALSE	FALSE	FALSE	FALSE	TRUE	TRUE	24.7052	25.653	25.6779	17.4822	36.6884
54R 03W 142-144	562.92	33.4931	11899200	768202	371632	130905	11078400	131855	88818.9	64193.5	153012	146514	49567.5	196082	461383	64228	35951.4	0	0.452299	2.83894	0.0335456	1.07409	0.101814	0.011762	1.91734	1.92092	0.00357367	0.068171	FALSE	FALSE	FALSE	FALSE	FALSE	FALSE	FALSE	FALSE	15.0311	15.4152	11.8382	4.14803	18.4541
54R 03W 142-145	563.92	33.5231	11501216	434213	187171	103306	10915416	153593	90137.2	65641.4	155779	150049	51776.2	201825	453819	63571.7	35105.5	131898	0.505611	1.81182	0.0171474	1.05367	0.0614472	0.013876	1.94869	2.04941	0.100726	0.0691936	FALSE	FALSE	FALSE	FALSE	FALSE	FALSE	FALSE	FALSE	18.3411	18.55	15.642	9.07623	24.2903
55R 01W 32-34	568.52	33.6	798356	50909.4	23606.8	8870.7	618748	14537.5	8820.3	15140.7	23961	6854.4	5478.3	12332.7	17557.3	4602.7	2740.4	3.20903e+06	0.480115	2.66121	0.0381526	1.29028	0.116353	0.0229557	1.75434	1.98561	0.231265	0.0800641	FALSE	FALSE	FALSE	FALSE	FALSE	FALSE	FALSE	FALSE	16.804	17.0508	14.0813	7.49079	22.4888
55R 02W 63-67	570.33	33.75	445964	35061.9	17319.4	5826.4	409872	9386.6	5261.9	7871.6	13133.5	3560.9	2775.6	6336.5	8617.3	2802.7	0	3606027	0.481289	2.97257	0.0422556	1.08806	0.12191	0.0223886	1.9105	1.98845	0.0779498	0.0641322	FALSE	FALSE	FALSE	FALSE	FALSE	FALSE	FALSE	FALSE	16.8766	17.1198	14.525	6.55621	21.414
55R 03W 15-19	571.35	33.8	2.56694e+06	176443	78119	24841.5	2098498	63739.2	21624.1	30648.4	52272.5	24572.3	39764	64336.3	42735	8906.5	0	16806334	0.485803	3.1447	0.0372261	1.22323	0.114433	0.0294784	1.80813	1.99947	0.191341	0.0705735	FALSE	FALSE	FALSE	FALSE	FALSE	FALSE	FALSE	FALSE	17.1539	17.3852	14.5882	6.57974	22.6282
55R 03W 104-106	572.24	33.9	627242	43082.4	20905.6	6934.7	582048	10705.8	7425.5	9923	17348.5	4522.5	3263.3	7785.8	16067.2	4027.1	2101.3	2.36743e+06	0.472214	3.01464	0.0359173	1.07765	0.106863	0.0180611	1.91857	1.96671	0.0481427	0.0661076	FALSE	FALSE	FALSE	FALSE	FALSE	FALSE	FALSE	FALSE	16.3111	16.5862	13.3698	6.20993	21.4277
55R 04W 111-114	573.81	34.0961	531432	37232.2	19337.3	7583.7	499170	11888.1	7414.7	10308.1	17722.8	7064.7	4374.7	11439.4	13417.5	4261.8	0	2.66436e+06	0.510369	2.54985	0.0387389	1.06463	0.11153	0.0232617	1.93639	2.0618	0.12541	0.0785967	FALSE	FALSE	FALSE	FALSE	FALSE	FALSE	FALSE	FALSE	18.6193	18.8297	16.8176	8.4285	23.8206
55R 05W 113-116	575.33	34.1905	235266	17710.8	9621.7	2919.8	221995	5847	4006.2	4532.3	8538.5	3787.2	2431.6	6218.8	6345	2075.2	0	2.37143e+06	0.509387	3.29533	0.0433419	1.05978	0.117214	0.0256625	1.93993	2.05923	0.119303	0.0868059	FALSE	FALSE	FALSE	FALSE	FALSE	FALSE	FALSE	FALSE	18.5621	18.7719	16.2737	8.87499	26.2742
55R 06W 5-8	575.75	34.2182	628036	41743.8	22143.4	7166.7	554606	9841.7	7029.5	10213.8	17243.3	6060.2	3421.7	9481.9	14026.2	3989.3	0	2.51079e+06	0.483979	3.08976	0.0399264	1.1324	0.111808	0.017436	1.87198	1.995	0.123017	0.0684487	FALSE	FALSE	FALSE	FALSE	FALSE	FALSE	FALSE	FALSE	17.0422	17.278	13.9886	7.55411	22.5023
56R 01W 27-29	578.17	34.3878	27416800	2113070	1552070	308469	26769300	491892	290311	356720	647031	238913	157744	396657	596645	132069	0	2412960	0.526801	5.03153	0.0579795	1.02419	0.127217	0.0180437	1.96393	2.10573	0.141802	0.0577386	FALSE	FALSE	FALSE	FALSE	FALSE	FALSE	FALSE	FALSE	19.5606	19.7959	17.7136	10.1286	26.3673
56R 01W 143-145	579.33	34.4742	82457.2	5657.6	3664.8	2007.1	67327.5	2667	2016.5	2353.8	4370.3	3106.8	2712.1	5818.9	3510.5	2250.6	0	2730836	0.595785	1.82592	0.0544324	1.22472	0.139313	0.038103	1.82552	2.30971	0.484187	0.169075	FALSE	FALSE	FALSE	FALSE	FALSE	FALSE	TRUE	TRUE	23.2161	23.8521	23.2652	15.8355	33.5111
56R 02W 73-76	580.13	34.5351	4478577	330294	160564	62073.5	4632846	78137.5	51861.8	55558.8	107421	45967.3	37705.5	83672.8	126248	24688.2	9855.5	3.69124e+06	0.476611	2.58667	0.0346577	0.966701	0.105042	0.0165862	2.02018	1.97717	0.0430039	0.0641069	FALSE	FALSE	FALSE	FALSE	FALSE	FALSE	FALSE	FALSE	16.5864	16.8447	13.8025	6.42931	21.3407
58R 01W 84-86	598.04	35.6976	288681	17823.7	10060.1	3591.9	256309	7467.2	4242.5	3256.5	7499	4945.7	4010.9	8956.6	10194.1	3372.7	2064.1	1.7497e+06	0.542312	2.80077	0.0392499	1.1263	0.106606	0.0283088	1.89033	2.14884	0.258511	0.0941823	FALSE	FALSE	FALSE	FALSE	FALSE	FALSE	FALSE	FALSE	20.4226	20.7079	18.9773	11.8288	28.5002
58R 02W 43-46	599.13	35.7442	50050800	3072820	2865270	605339	49395900	845628	571440	562919	1134359	612632	328612	941244	1517200	278037	104608	10548200	0.584139	4.73333	0.0580062	1.01326	0.115232	0.0168313	1.98047	2.27306	0.292584	0.0678032	FALSE	FALSE	FALSE	FALSE	FALSE	FALSE	FALSE	FALSE	22.6297	23.1674	22.0667	14.5763	32.6405
59R 01W 66-68	607.56	36.0613	355530	24490	14759.4	5825.5	364705	7019.3	7194.2	5525.7	12719.9	8716.7	5040.4	13757.1	22967	3066.4	0	1567421	0.52989	2.53359	0.0404694	0.974841	0.108145	0.0188831	2.01777	2.11419	0.0964143	0.119387	FALSE	FALSE	FALSE	FALSE	FALSE	FALSE	FALSE	FALSE	19.7343	19.9775	18.1932	8.77806	26.6092
